# Supplementary material
Source: publisher figshare collection journal article supplement (https://gsajournals.figshare.com/ndownloader/files/17869262)
Supplement: Supplementary file 1 [file 17869262]

**Supplementary Information 3**

SNP panels constructed by selecting SNPs based on their physical distance. SNPs were selected so that they would be on average equally spaced within each chromosome with a step of 0.5, 1, 3, 5, 7, 9, and 11 Mbp between them.

**Figure S3. Average genomic prediction accuracies when SNPs were selected based on physical distance**

**Table S3. SNP counts for each LD SNP panel density**

| **Step** | **Selected SNPs count** |
| --- | --- |
| **250000** | 8348 |
| **500000** | 4239 |
| **1000000** | 2147 |
| **3000000** | 739 |
| **5000000** | 451 |
| **7000000** | 331 |
| **9000000** | 260 |
| **11000000** | 217 |
